# Supplementary material
Source: PubMed Central journal article supplement (PMC1317669)

|                  |                                                                  |                                                                   |
|------------------|------------------------------------------------------------------|-------------------------------------------------------------------|
| <b>BphP</b>      | <i>Dr BphP</i>                                                   | AQARALYTRHLLRLTADTRAAAVPLDPLVLPQTNAPTPLGGAVLRATSPMHMQYLRRNM       |
|                  | <i>Nc CphB</i>                                                   | QQARKLYSQNWLRRLIPDAKYQPVPIVPIINPLNDQPLDLSRSVLRVSPHIEYMQNM         |
|                  | <i>Ci CphB</i>                                                   | KQARQLYRDNWLRRLIPVDVYQPVALLPHHNPVTNQPTDLSHSVLRVSPHIEYLRNM         |
|                  | <i>Pf BphP</i>                                                   | EQARELYRTNWLRRLIPNADYQPVLPKLRPDTQTPLDLSFATLRVSPHICQYMKNM          |
|                  | <i>Ps BphP1</i>                                                  | EQARELYRRNWLRRLIPDANYTPVPLVPQLRPDTQQQLDLSFSTLRVSPHICQYMKNM        |
|                  | <i>Ps BphP2</i>                                                  | AQARELYRLNWLRRLIPDATYVPPVALIPTLRPATGQPLDLSLSTLRVSPVHCEYLKNM       |
|                  | <i>Pa BphP</i>                                                   | AQARRLYIQNPRLIADVAYTPMRVFPALNPETNESFDLSYSVLRVSPHICQYLRNM          |
|                  | <i>Pp BphP1</i>                                                  | RQARELYRVNRIRVIEDANYQPSPLLPATNPRTGKPLDMSFAALRSVSPVHLYQYMRNM       |
|                  | <i>Pp BphP2</i>                                                  | QQARALYLRNPIRVIDAQFNTVAINPVL . PSGEPLDLSYAHLSRVSPHICQYLRNM        |
|                  | <i>EnvSeq-1</i>                                                  | AQARALYIRNRIRLIADAGYTPVPLVPPLHPLTGNPTDLYTSSLRVSPVHLYQYMRNM        |
|                  | <i>EnvSeq-2</i>                                                  | SQARALYLKNRVRCVFDVEHPPIALIPVQFAERPPMDLSMSMVRVSPVHLYQYMRNM         |
|                  | <i>EnvSeq-3</i>                                                  | EQARELYRTNWLRRLIPNASYEPVLPKLRPDTGQPLDLSFATLRVSPHICQYMQNM          |
|                  | <i>EnvSeq-4</i>                                                  | SQARELYLKNRVRVDFVEEQVIGLKPVSREAERPPLDLSMSMVRVSPMHIAYLKNM          |
|                  | <i>EnvSeq-7</i>                                                  | AQARALYKTNWVRLTPDTELLPAKLVLPSTEASGREPLDLTRSLRTRTFSPHLYQYLRNQ      |
|                  | <i>EnvSeq-12</i>                                                 | RIARELYLKNPWRLIPNAPAAPLPIR . . . SLTGRPPDLSMSDLRSVSPHIVAYLANM     |
|                  | <i>Xc BphP</i>                                                   | AQARALYLRNRVRIADVGYQPSPIQPTVHPQLGTPVDLSDVLSRVSPVHLEYLANM          |
|                  | <i>Xa BphP</i>                                                   | AQARALYLRNRVRIADVRYQPSPIQPTLHPRLGTPVDLSDVLSRVSPVHLEYLANM          |
|                  | <i>Ra BphP</i>                                                   | QIARALYLRQRVGAITADACYRPVPLLGHPLEDDGKPLDLSHSSLRVSPHLYQYMRNM        |
|                  | <i>Kr BphP</i>                                                   | AQARRLYTLNWRRLIADVDYVPSPLHPLDPTGAPLSDLSHSVLRVSPHVEYLRNM           |
|                  | <i>Mm BphP</i>                                                   | VIARDLYTLNRQYIRDALAGSVPIG . . CDPADGAPDQTFGLRSVSPMHLTYLGNM        |
| <i>Cyh BphP</i>  | VQARELYIKNLRVIGDVNYKPVPIYTIIDS . ENQNLDSLSCVLRVSPHIVQYLRNM       |                                                                   |
| <i>Rr BphP</i>   | AQARALYSRNLRSIPDVHYRPLPLVGRSP . DGRELDMTFCNLRVSPVHLEYLRNM        |                                                                   |
| <i>Rc Ppr</i>    | RQARELYSQSLSRHVPDRDYVPPV . VHRIE . . GTEPLDLSFSRHRSLSPVHLYQYLRNM |                                                                   |
| <i>Ri BphP</i>   | VQARALYLRNLRRLIADVDVAVPVPILPPLD . EHGQPLDLSMSVLRVSPHIEYLRNM      |                                                                   |
| <i>At BphP1</i>  | PQARQLYTIINRLRMIIPVDYKPVPIRPEVNAETGAVLDMFSFQLRSVSPVHLEYMRNM      |                                                                   |
| <i>At BphP2</i>  | QQARALYLRNLRRLIISDASGTRIPVLPVAVD . VSGEPLDLSYAHLSRVSPHICQYLRNM   |                                                                   |
| <i>Br BphP</i>   | QIARRLYERNRVRLLVDVNYTPVPLQPRIISPLNGRDLDMSLSCLRVSPHIVQYLRNM       |                                                                   |
| <i>Rp BphP1</i>  | AQARRLYTINPVRIPDINYPVPTPDLNPTVTRPIDLSFAILRSVSPVHLEYMRNM          |                                                                   |
| <i>Rp BphP2</i>  | AQSRALYTIINPVRIPDIGYRPSPLVPDINPRLGGPIDLSFVLSRVSPHILEYMRNM        |                                                                   |
| <i>Rp BphP3</i>  | APARRLFALSWSVRLHLPDVGYPVPLLAAKSPLVTGPVDMSFASLRVSPVMTGYLKNM       |                                                                   |
| <i>Rp BphP4</i>  | NQPGSIS . . RIRVQPDVHAPAAPLWPAHSPRNLALDLSFSATRSASPEHRLYLAQL      |                                                                   |
| <i>Rp BphP5</i>  | QQARLLYLKNAIRVISDSRGISSRIVPERD . ASGAALDLSFAHLRSVSPHILEYLRNM     |                                                                   |
| <b>Fph</b>       | <i>Nc Phy1</i>                                                   | PQARKLYMIKVRVLFDRSQRTSRLIGRDVSDMDVPLDLDLTHAYLRAMSPVHLKYLNSNM      |
|                  | <i>Nc Phy2</i>                                                   | SQARELYKLNKVRLLYDRDVESARIVCRTPEDLETPLDMTHSYLRAMSPHILKYLNSNM       |
|                  | <i>Um Phy</i>                                                    | AQARALYKINKVRLYDRDQPTARMICRDQADLDFPVDMTAHFIRAMSPHILKYLNSNM        |
|                  | <i>Gz Phy</i>                                                    | RQARDLYKLNKINCLPNKRRRPHS . . . ARHEPILLSASHVAYSYH . . . . . YLKNM |
|                  | <i>Bf Phy1</i>                                                   | KQARELYKVNKVRLLYDRDLETARLVCRGVEELENPLDLSYAYLRAMSPHILKYLNSNM       |
|                  | <i>An Phy</i>                                                    | KQARDLYRINKVRLYDRDHVTARLVCRALDLETPLDMTHAYLRAMSPHILKYLNSNM         |
|                  | <i>Gm Phy</i>                                                    | RQARDLYKLNKVRLLYDRDQDTSRIVCRTKEDLDVPLDMSHSLRSVSPHILKYLNSNM        |
| <i>Ch Phy</i>    | KQARELYKINKVRMLYDRDLQATARLVCRTAEDLEVPLDLDLTHSYLRAMSPHILKYLNSNM   |                                                                   |
| <i>Bf Phy2</i>   | KQALDLYKINRIRMLHLDREKRTARLVCRHQSDFEKPLDLDLTHAYLRAMSPHILKYLNSNM   |                                                                   |
| <b>Cph</b>       | <i>Sy Cph1</i>                                                   | QPARRLFIHNPRIVPIPDVYGVAVPLTPAVNPSTNRAVDLTESILRSAYHCHLTYLKNM       |
|                  | <i>Sy Cph2-A</i>                                                 | PQAREELGNQRKMIAVDVAHRRKK . . SHELSGRISPTHEHSNGHYTTVDSCHIQYLLAM    |
|                  | <i>Nc CphA</i>                                                   | KPARKLFIINSITRVIIPNAQAQAIQMI PALNPVSDRPVLDLNSILRSAAACHLEYLHNM     |
|                  | <i>Np Cph1</i>                                                   | KPARKLFAANSIRIIPDAYSQPVKLPVNNPISDRPINLNTNSILRSAAACHLEYLHNM        |
|                  | <i>Np Cph2</i>                                                   | AQARELYTRCFRFLRPLDLTAEPVKLVPTENPTTHQHLDLSYCLLRSFDWCCAEYHQN        |
| <i>Ci CphA</i>   | KPARKLFAANSITRILIPDAHAEPVQILPINHPQSQPIDLNTSILRTAANCHLEYLHNM      |                                                                   |
| <i>Cw Cph</i>    | LPARRLFSSNYIRLIPDAKATGIDLFSKLHPLNDTALDLDLTHSILRSASPECHLEYLHNM    |                                                                   |
| <b>plant phy</b> | <i>Ath phyA</i>                                                  | QAARFLFMKNKVRMIVDCNAKHARVLQDEKLS . . FDLTLCGSTLRAPHSCHLQYMANM     |
|                  | <i>Ath phyB</i>                                                  | QASRFLFKQNRVRMIVDCNATPVLVVQDDRLT . . QSMCLVSGSTLRAPHGCHSQYMANM    |
|                  | <i>Ath phyC</i>                                                  | QASRFLFMRNKVRMIVDCSAPVVKVQDKLS . . QPISLSGSTLRAPHGCHAQYMSNM       |
|                  | <i>Ath phyD</i>                                                  | QASRFLFKQNRVRMIVDCYASPVVRVQDDRLT . . QFICLVGSTLRAPHGCHAQYMTNM     |
|                  | <i>Ath phyE</i>                                                  | QAARFLFKQNRVRMIVDCNATPVKVVQSEELK . . RPLCLVNSTLRAPHGCHTQYMANM     |
| <b>Phy-Like</b>  | <i>Gv Cph</i>                                                    | DGYQEQRRRGRI GAIADIE . . . . . TAPIQPCHADFTRRF                    |
|                  | <i>Te Cph</i>                                                    | RESAEAYVQGRVLAIAIDIN . . . . . TATLAQCHRDFLSOL                    |
|                  | <i>Av Cph</i>                                                    | ETHGEEKYRQGLQAIADIY . . . . . AEDISECHRDLLIQF                     |
|                  | <i>Syn P1pA</i>                                                  | PECYQRVYLNQYIYASRDQL . . . . . PDCATNCAVQCFTVA                    |
|                  | <i>Syn TaxD1-C</i>                                               | DSYVEKYRSGRIQATRDYIY . . . . . NAGLTPCHIGQLKPF                    |
|                  | <i>Fd RcaE</i>                                                   | QEYQQLVYAQGRVRAIADVHD . . . . . PTAGLAECLVEFVDQF                  |
|                  | <i>Syn RcaE</i>                                                  | VEYHQAYTKGKVRAINDID . . . . . QDDIEICLADFKVQF                     |
|                  | <i>Syn TaxD1-N</i>                                               | HPWGQEDMPSQIVAINDT . . . . . GASISNPHRQWLEQH                      |
|                  | <i>Syn Cph2-C</i>                                                | GHYLRVYRGRVRAVSDIE . . . . . KADLADCKKELLRYH                      |
|                  | <i>Se CikA</i>                                                   | LSVIDPLVQPGLLITTEEW . . . . . QRFOQGETLLIDSVGFYKERLEQYSFYERY      |
|                  | <i>Ma BphP1-N</i>                                                | KLYSKAINGIQVQVNSETA . . . . . GTAAGTGKRVIVGNIMKDPFCRECREIAQKV     |
|                  | <i>Ma BphP1-C</i>                                                | VKSMGLWGEAVRQRKPIIT . . . . . NDYPAPNPLKKGYPKNN                   |

|                  |                                                   |                                                              |
|------------------|---------------------------------------------------|--------------------------------------------------------------|
| <b>BphP</b>      | <i>Dr BphP</i>                                    | G.VGSSLSVSVVVGG.....QLWGLI.ACHHQTQYVLP..PDLRRTTL             |
|                  | <i>Nc CphB</i>                                    | G.VGASLTISLIKDN.....KLWGLI.ACHHLSAKYIP..YEIRSAC              |
|                  | <i>Ci CphB</i>                                    | G.VKASMSISLLKNQ.....KLWGLI.ACHHESPKYVY..YEIRSAC              |
|                  | <i>Pf BphP</i>                                    | G.VLSSMSISLLKGD.....KLWGLI.SCGNRQPLHVP..HELRTAC              |
|                  | <i>Ps BphP1</i>                                   | G.VLSSMSVSLIQGG.....KLWGLI.SCGHRTPLYVS..HELRSAC              |
|                  | <i>Ps BphP2</i>                                   | G.VRSSMSISLLDGG.....ELWGLI.TCSHPEPLLV..RELRDAC               |
|                  | <i>Pa BphP</i>                                    | G.VRASMSISIVVGG.....KLWGLI.SCHHMSPKLIP..YPVRMSF              |
|                  | <i>Pp BphP1</i>                                   | G.TLASMSLSIVVDG.....QLWGLI.SCHHQQRPVVD..LRTRTAC              |
|                  | <i>Pp BphP2</i>                                   | G.VGASMSISIVVNG.....ELWGLI.ACHHYAPRTLA..MGQRVAA              |
|                  | <i>EnvSeq-1</i>                                   | G.TLSSMSMSIVVRG.....QLWGLI.SCHHDTARIPS..FEVRAAC              |
|                  | <i>EnvSeq-2</i>                                   | G.IRSSFSVSLVFEQ.....KLWGLI.ACHNNEPKYID..QKKRLVC              |
|                  | <i>EnvSeq-3</i>                                   | G.VLSSMSISLMKGD.....KLWGLI.SCGNREPLLV..NDLRMAC               |
|                  | <i>EnvSeq-4</i>                                   | G.VRSSFSVSLVFEQ.....KLWGLI.ACHNSKPAYID..QKKRLVC              |
|                  | <i>EnvSeq-7</i>                                   | G.LRASFSISLVTDG.....ELWGLI.SCHHREACYIP..QDVRLOC              |
|                  | <i>EnvSeq-12</i>                                  | E.VLASLSLPVIAAK.....SLWGLV.ACHSRSPTLIG..LETLSAA              |
|                  | <i>Xc BphP</i>                                    | G.VTATLVASIVVND.....ALWGLI.SCHHYSPHFTN..HAMRDVT              |
|                  | <i>Xa BphP</i>                                    | G.VSATLVSIIVVND.....ALWGLI.SCHHYSPHFTS..HAMRDAT              |
|                  | <i>Rs BphP</i>                                    | N.TAASLTIGLADG.....RLWGLI.VCHNTPRIAG..PEWRAAA                |
|                  | <i>Kr BphP</i>                                    | G.VGASMSISLIVEG.....RLWGLV.ACHHYSGAHRPG.YDAQSAA              |
|                  | <i>Mm BphP</i>                                    | G.VRASFSASILMRG.....KLWGLI.ACHHPEPKPLS..LDVROQL              |
|                  | <i>Cyh BphP</i>                                   | G.VGATLTISLIHKK.....KLWGLV.ACHHYSPLYLH..YETKLA               |
|                  | <i>Rr BphP</i>                                    | G.VAASFSVSLVVDG.....RLWGLV.ACHDRVPRRLS..LATMGAC              |
|                  | <i>Rc Ppr</i>                                     | G.VTASMSFSLVVEG.....RLWGLV.AAHHRQPHHVA..IPRRSAA              |
|                  | <i>Ri BphP</i>                                    | G.VGASLSISIVVDG.....KLWGLI.ACHHYSPLYLH..YETKLA               |
|                  | <i>At BphP1</i>                                   | G.TAASMSVSIIVVNG.....ALWGLI.ACHHATPHSVS..LAVREAC             |
| <i>At BphP2</i>  | G.VAASMSISIVVDG.....ALWGLI.ACHHYSPRVLS..MPVRIAA   |                                                              |
| <i>Br BphP</i>   | G.VGATLVCSLMVSG.....RLWGLI.ACHHYEPRFVP..FDIRAAAG  |                                                              |
| <i>Rp BphP1</i>  | G.MHGTMSISILRGE.....RLWGLI.ACHHRKPNYVD..LDGRQAC   |                                                              |
| <i>Rp BphP2</i>  | G.MHAAMSISIVRDN.....RLWGLI.SCHNLTFRFVS..YEVROAC   |                                                              |
| <i>Rp BphP3</i>  | G.VQSTLVMPPLVKEG.....RLWGLI.SAMHHAAPRHIS..HQMRMAA |                                                              |
| <i>Rp BphP4</i>  | G.VAASLSLSLVVEG.....ELWGLI.VCHHATPRFLP..YRMREAC   |                                                              |
| <i>Rp BphP5</i>  | G.VSASMSLSIITIDG.....TLWGLI.ACHHYEPRFVP..MAQRVAA  |                                                              |
| <b>Fph</b>       | <i>Nc Phy1</i>                                    | G.VRSSMSMSLESDDG.....KLWGLI.VCHSYGPAATRVPFSIRELS             |
|                  | <i>Nc Phy2</i>                                    | A.VRSSMSISINAFG.....DLWGLV.SCHSYGPKGMRVSPPIRKM               |
|                  | <i>Um Phy</i>                                     | G.VRSSMSVSTAFG.....ELWGLI.SLHNYGAGHKRVSPPIRQLL               |
|                  | <i>Gz Phy</i>                                     | A.VRSSMSISINAFN.....ELWGLI.SCHSYGNHGMRVSPPIRKM               |
|                  | <i>Bf Phy1</i>                                    | A.VRSSMSISINAFG.....ELWGLI.ACHTYGPKGMRVSPPIRKM               |
|                  | <i>An Phy</i>                                     | Q.IRSSMSISINSMN.....DLWGLI.SCHSYGPKGMRVSPPIRKM               |
|                  | <i>Gm Phy</i>                                     | A.VRSSMSISINAFN.....ELWGLI.SCHSYGNHGMRVSPPIRKM               |
| <i>Ch Phy</i>    | A.VRSSMSISINAFG.....ELWGLI.ACHTYGPKGMRVSPPIRKM    |                                                              |
| <i>Bf Phy2</i>   | G.VRSTMSVSIIVNG.....DLWGLI.ACHGYGSHGTRVTLPMRELA   |                                                              |
| <b>Cph</b>       | <i>Sy Cph1</i>                                    | G.VGASLTISLIKDG.....HLWGLI.ACHHQTQPKVIP..FELRKAC             |
|                  | <i>Sy Cph2-A</i>                                  | G.VLSSLTVPVMQDQ.....QLWGLI.AVHHSKPRRFT..EQEWETM              |
|                  | <i>Nc CphA</i>                                    | G.VTASMSISIMKNQ.....KLWGLI.ACHHQSPLYVS..YELRKAC              |
|                  | <i>Np Cph1</i>                                    | G.VGASLTISLIKDQ.....KLWGLI.ACHHQSPLYVS..YELRKAC              |
|                  | <i>Np Cph2</i>                                    | G.VKALLVISLIQEQ.....KLWGLI.SCHHQTQPKYIS..YEVKMKC             |
|                  | <i>Ci CphA</i>                                    | G.VGASLTISLIKDG.....KLWGLI.ACHHQTQPKYVS..YEFKAC              |
| <i>Cw Cph</i>    | G.VGASLTISLIDDR.....KLWGLI.ACHHLTQPKYVY..YELRKAC  |                                                              |
| <b>plant phy</b> | <i>Ath phyA</i>                                   | D.SIASLVMVVVNEEDGEEDGAPDATTQPQKRKLWGLV.VCHNTTFRFVP..FPLRYAC  |
|                  | <i>Ath phyB</i>                                   | G.SIASLAMAVIINGNEDDG..SNVASG.RSSMRLWGLV.VCHHTSSRCIP..FPLRYAC |
|                  | <i>Ath phyC</i>                                   | G.SVASLVMSTINGSDDSD..EMNRDLQGRHLWGLV.VCHHASPRFVP..FPLRYAC    |
|                  | <i>Ath phyD</i>                                   | G.SIASLAMAVIINGNEEDG..NGVNTGGRNSMRLWGLV.VCHHTSARCIP..FPLRYAC |
|                  | <i>Ath phyE</i>                                   | G.SVASLALAVVVGK.....KDSKSLWGLV.VGHCSPRFVP..FPLRYAC           |
| <b>Phy-Like</b>  | <i>Gv Cph</i>                                     | A.VRANLVVPILQ.....REQWLWGLLIAHQCSAPRQWS..TFETELL             |
|                  | <i>Te Cph</i>                                     | Q.VRALLAVPIIQEER.....LWGLFLCHHCSSARPWA..NDEVELI              |
|                  | <i>Av Cph</i>                                     | Q.VKANLVVPILQGEK.....LWGLLVTNQCGTSRHWQ..SWEIDL               |
|                  | <i>Syn PlpA</i>                                   | E.SQSRIVAPIVFDHS.....LWGLLIVHQCSSRTWQ..TAEIQLM               |
|                  | <i>Syn TaxD1-C</i>                                | E.VKANLVAPINYKN.....LWGLLIAHQCSGPRDWH..QNEIDLF               |
|                  | <i>Fd RcaE</i>                                    | H.IKAKLIVPIVQNLNANS.....QNQLWGLLIAHQCDSVRQWV..DFELEM         |
|                  | <i>Syn RcaE</i>                                   | G.VKSKLVVPIIQHNRASSLD..NESEFPYLWGLLITHQCAFTRPWQ..PWEVELM     |
|                  | <i>Syn TaxD1-N</i>                                | Q.VKASLTVPLHRDN.....YPLGLLMAHHCQRPHQWE..MREQOFL              |
|                  | <i>Syn Cph2-C</i>                                 | Q.VKANLVVPPVFNEN.....LWGLLIAHECKTPRYWQ..EEDLQLL              |
|                  | <i>Se CikA</i>                                    | Q.VRSVCKIPILVQG.....RLWGLLVVAHQCDHRWQ..PRELDIL               |
|                  | <i>Ma BphP1-N</i>                                 | G.LKACWAEPFSSGG.....EVLGVFTIYLRRETRKPRE..EELEFI              |
|                  | <i>Ma BphP1-C</i>                                 | VHLIRHLNIPVFDGK.....RIVAVAGVGNKEENYDES..DVRQL                |

Supplemental Figure 1-Page 4. Karniol et al.

|                   |                       |                          |                       |
|-------------------|-----------------------|--------------------------|-----------------------|
| <b>BphP</b>       | <i>Dr</i> BphP        | EYLGRLLSLQVQVKEAADVAA    | 326                   |
|                   | <i>No</i> CphB        | EFLGQMTSVEMSAKEDSEDT     | 326                   |
|                   | <i>Cf</i> CphB        | EFLGQMTSLELAAKEDSENTE    | 343                   |
|                   | <i>Pf</i> BphP        | QTIGQVLSLQISAMEALEVSR    | 322                   |
|                   | <i>Ps</i> BphP1       | QAIGQVLSLQISAMEALEVSR    | 322                   |
|                   | <i>Ps</i> BphP2       | AMIGQLLSVKISAIIVATHIQ    | 322                   |
|                   | <i>Pa</i> BphP        | QIFSQVCSAIVERLEQGRIAE    | 313                   |
|                   | <i>Pp</i> BphP1       | ELLASVLSLQTESRESHASTR    | 333                   |
|                   | <i>Pp</i> BphP2       | EMFGEFFSLHLETLLRSRQKLE   | 314                   |
|                   | EnvSeq-1              | EHTAEVLSLQIEAKEEHAQAA    | 327                   |
|                   | EnvSeq-2              | ESLGHLIYAWQLHTKALHEK . . | 321                   |
|                   | EnvSeq-3              | QTIGQVLSLQISAMEALELSR    | 166                   |
|                   | EnvSeq-4              | ESLGHLIYAWQLHTKALHKKKE   | 184                   |
|                   | EnvSeq-7              | ENLSQLFSWHLLAKEEEI AKR   | 345                   |
|                   | EnvSeq-12             | RSIVKHYNMALLQSHAEERIR    | 319                   |
|                   | <i>Xc</i> BphP        | DAVARTLAGRIGALQAVARAR    | 318                   |
|                   | <i>Xa</i> BphP        | DAVTRALAGRIGALQAVGRAR    | 318                   |
|                   | <i>Rs</i> BphP        | GMIGQVVSLLLSRRLGEVENAA   | 401                   |
|                   | <i>Kr</i> BphP        | EFLSQTASQLTGERARSQERD    | 334                   |
|                   | <i>Mm</i> BphP        | VKIARDFSVGLLVYIASIHLK    | 316                   |
|                   | <i>Cyh</i> BphP       | KLQGHFITSQIEIREQNEQYA    | 318                   |
|                   | <i>Rr</i> BphP        | QVYAETIAQQLRLDNRTRRSR    | 311                   |
|                   | <i>Rc</i> Ppr         | MTVVEAVALSTAAVERAEAMR    | 461                   |
|                   | <i>Rf</i> BphP        | ELFGQMFASRLESRRERLALD    | 317                   |
|                   | <i>At</i> BphP1       | DFAAQLLSMRTAMEQSSQDAS    | 316                   |
|                   | <i>At</i> BphP2       | EMFGEFFSMHLQVLKQKRRLD    | 314                   |
|                   | <i>Br</i> BphP        | EALAECAIRTAALLESFAQSQ    | 318                   |
|                   | <i>Rp</i> BphP1       | ELVAQVLAQWIGVMEEQAITR    | 321                   |
|                   | <i>Rp</i> BphP2       | ELIAQVLTWQIGVLEEAIEIVR   | 335                   |
|                   | <i>Rp</i> BphP3       | EFLAHTLSLLMSAKEDAEQFE    | 329                   |
|                   | <i>Rp</i> BphP4       | ALFAEMASLQLETRLAADQLA    | 325                   |
|                   | <i>Rp</i> BphP5       | EMFADFFSLHFTAHHQRRFQ     | 314                   |
|                   | <b>Fph</b>            | <i>Nc</i> Phy1           | FFVGLAASTCLQKLLNSERLQ |
| <i>Nc</i> Phy2    |                       | RLIGDTASRNTERLSYASRLQ    | 672                   |
| <i>Um</i> Phy     |                       | RLIGESVSSNTERLSYTRRLS    | 651                   |
| <i>Gz</i> Phy     |                       | RLVGDTASRNTERLSYASRLQ    | 667                   |
| <i>Bf</i> Phy1    |                       | RLVGDTASRNTERLSYASRLQ    | 281                   |
| <i>An</i> Phy     |                       | RLIGDTVSRNTERLSYASRLQ    | 572                   |
| <i>Gm</i> Phy     |                       | RLVGDTASRNTERLSYASRLQ    | 617                   |
| <i>Ch</i> Phy     |                       | RMIGDSASRNTERLSYASRLQ    | 602                   |
| <i>Bf</i> Phy2    | RNIGECASTNTERLLMRQRIE | 542                      |                       |
| <b>Cph</b>        | <i>Sy</i> Cph1        | EFFGRVVFNSISAQEDTETFD    | 326                   |
|                   | <i>Sy</i> Cph2-A      | ALLSKEVSLAITQSQLSRQVH    | 196                   |
|                   | <i>Nc</i> CphA        | EFLGRVIFAETISAREETEDYD   | 326                   |
|                   | <i>Np</i> Cph1        | EFLGRVIFAETISAREETEDYY   | 326                   |
|                   | <i>Np</i> Cph2        | EFLGQIVSSELAHKISSSEWD    | 324                   |
|                   | <i>Cf</i> CphA        | EFLGRVIFTEISTREETEDYD    | 326                   |
|                   | <i>Cw</i> Cph         | EFLGQVVFSETSAKEETKDYD    | 160                   |
| <b>plant phy</b>  | <i>Ath</i> phyA       | EFLAQVFAIHVNKEVELDNQM    | 408                   |
|                   | <i>Ath</i> phyB       | EFLMQAFGLQLNMELQLALQM    | 435                   |
|                   | <i>Ath</i> phyC       | EFLTQVFGVQINKEAESAVLL    | 399                   |
|                   | <i>Ath</i> phyD       | EFLMQAFGLQLNMELQLALQV    | 443                   |
|                   | <i>Ath</i> phyE       | EFLMQAFGLQLQMEQLASQL     | 393                   |
| <b>Phy-Like</b>   | <i>Gv</i> Cph         | LQLADQMGIALAAQAQLLEQET   | 331                   |
|                   | <i>Te</i> Cph         | RQLGEQLSFGIHRRAELVSALH   | 685                   |
|                   | <i>Av</i> Cph         | QQLATQVGIAIQQSELYEQVR    | 195                   |
|                   | <i>Syn</i> PlpA       | QSLGNQLAIAIQQSLLYERLQ    | 852                   |
|                   | <i>Syn</i> TaxD1-C    | GQLTVQVGLALERSDLLAQKQ    | 660                   |
|                   | <i>Fd</i> RcaE        | QQLADQISIALSQAQLLGRLE    | 272                   |
|                   | <i>Syn</i> RcaE       | KQLANQVAIAIQQSELYEQQL    | 221                   |
|                   | <i>Syn</i> TaxD1-N    | QQLTEELQTTLDLANLIQERN    | 488                   |
|                   | <i>Syn</i> Cph2-C     | MELATQVAIAIATHQGELYEQLE  | 1090                  |
|                   | <i>Se</i> CikA        | QHLAEHLSIAIYQAQLYGQLQ    | 353                   |
| <i>Ma</i> BphP1-N | RTNAYLAGIAIEHVQAADALK | 467                      |                       |
| <i>Ma</i> BphP1-C | TLLMQGMWQLIQRKQLEEAR  | 761                      |                       |





|                  |                                                               |                                                                 |
|------------------|---------------------------------------------------------------|-----------------------------------------------------------------|
| <b>BphP</b>      | <i>Dr BphP</i>                                                | LVQTDALGQLWPAG..ADLAPSAA*GLLAISVG...EGWSECLVWLRPELRLEVAWGG.*    |
|                  | <i>Nc CphB</i>                                                | IFATDSLATVYPDA..EKLRDVASGLLIALSISR...SQ.KNYILWFRPEVVRTVDWGCN    |
|                  | <i>Ci CphB</i>                                                | VFHTNCLSEL.LPEA..SEWKDVASGLMALSISK...SQ.KSYLLWFRPEALQTVDWAGN    |
|                  | <i>Pf BphP</i>                                                | VFASHHLASV.YPPA..AHYQVASGVLAMSLPK...PV.DNGVLWFRPEVKENINWSGD     |
|                  | <i>Ps BphP1</i>                                               | VYASHHLSSV.YPPG..EAYQTLASGVLAMSLPK...PV.DNGVIWFRPEVKQSVQWVSGD   |
|                  | <i>Ps BphP2</i>                                               | VFHTDSMQRE.RPES..AAYRETASGVIAFTLPK...PV.DNAVMMWFRSOLASTMWNWVSGN |
|                  | <i>Pa BphP</i>                                                | IYHTDNWPPQ.SEDS..PD.GGDCCGVLAIRFHRQE...SGWIFWFRHEEVHRIIRWVCGK   |
|                  | <i>Pp BphP1</i>                                               | VFHSDNIRRD.ITEL..PELANHAGGVLAVAISQ...IH.SHYLLWFRPEQIRTVNVAWGO   |
|                  | <i>Pp BphP2</i>                                               | IWASNRLSTV.LPSA..QAYFNDVSGVLIIPMSQHP...RDYLIFFRKEVETLVDWAGD     |
|                  | <i>EnvSeq-1</i>                                               | TFHTDRIATT.CPIL..DPHPNYA.GMLAVSISK...LF.RNYVLWFRPEVQTIKWAGD     |
|                  | <i>EnvSeq-2</i>                                               | SIATSKLAEE.VSEQ...CDLNGIRGMYISCVSAKL...GYTTVWFRPEQKDKTIRWAGR    |
|                  | <i>EnvSeq-3</i>                                               | VFSSHNLASV.YPPA..AEYQSVASGVLAMSLPK...PV.DNGVLWFRPEVKENINWVSGD   |
|                  | <i>EnvSeq-7</i>                                               | SIAINRIANE.VSDS...CNLNGIRGM.....                                |
|                  | <i>EnvSeq-8</i>                                               | .YTNDALY.....                                                   |
|                  | <i>EnvSeq-12</i>                                              | LWHTVSLTQT.FPGI..APLPVAGLMALKLPKNSE.....FWIFRFPETIQEIAWGCN      |
|                  | <i>Xc BphP</i>                                                | ALHVDALGEV.FPEL..ADLAPLAAGFIFVPLMPQS...RSALLWTRREIQIQKWAGN      |
|                  | <i>Xa BphP</i>                                                | ALHVDALGEV.FPEL..ADLAPLAAGFIFVPLMPQS...RSALLWTRREIQVQVQKWAGN    |
|                  | <i>Rs BphP</i>                                                | VLSLDDVTLR.HPEL..PELLAAGSGILLPLTSQD...GDLIWFRPEHVQTTWGCN        |
|                  | <i>Kr BphP</i>                                                | PTFTDHLPTL.DPGL..AEVAQTAAGALRVGIDG...TGW...LLWLRPERPRLLDWVSGD   |
|                  | <i>Mm BphP</i>                                                | FASTAHLAAQ.IPEA..ETFRAQASGVIALRVRLAWLSGSSLRWFWRREWPHLVQWAGD     |
|                  | <i>Cyh BphP</i>                                               | .QYATHFITAEPLDFK.NITASGIAGINYHALDKTS...NSCIMWYKPEITITEVWAGD     |
|                  | <i>Rr BphP</i>                                                | LLLSERLGGGR.LRLP..AELAGSFVGGVLLPLSDQP...DRDFLLLRPETLRSIEWAGR    |
|                  | <i>Rc Ppr</i>                                                 | LFRTSSLSSV.FPDA..TAYRQKASGCLALRLSG...GDFVMWTRPEEPRQITWGGD       |
|                  | <i>Rl BphP</i>                                                | IYAVDRILAET.YPDL..EV.DDAVAGMLAIPISRSP...RDYVVLFRQELVTRVWCGD     |
|                  | <i>At BphP1</i>                                               | VFATDNLAGN.YPTA..AAYASVASGILAMRVSE...LH.GSWLIWFRPEVIKTRVWCGD    |
|                  | <i>At BphP2</i>                                               | VWATHALSQA.IPEA..EYAGTAA.GMLAIPLSQVK...SDYLLFFRKEIVQNLNWAAGN    |
|                  | <i>Br BphP</i>                                                | LTVTASLTLTLD.DPSF..ADIRSIASGLIAAPLSA...SEG.EYLLWFRPEQVRTVTVWCGD |
|                  | <i>Rp BphP1</i>                                               | LFQTDRLSTI.IPEA..GAFAEVASGLAVPLSR...TPRRVMLWFRPEVAQTIVWAGN      |
| <i>Rp BphP2</i>  | IFQTTQLSAS.FPEA..EVYSDIASGLLAVPLGR...AS.TTLMLWFRPEVAQTVTVWGGD |                                                                 |
| <i>Rp BphP3</i>  | FA.TDRIPNL.DPAA..QAVASQASGVLALRP...LPDQPMLIAWLRPEQIEDVQWAGD   |                                                                 |
| <i>Rp BphP4</i>  | VYHTDCLALA.YPPA..KAFAGCASGLLALSLSN...TP.HNYVLWFRPEVVRVTVWAGM  |                                                                 |
| <i>Rp BphP5</i>  | IVATHALTDR.IAAA..TDYAGAAA.GMLAIPLSQVA...GDYLLFFRKEQVQTLNWAAGD |                                                                 |
| <b>Fph</b>       | <i>Nc Phy1</i>                                                | ILFSHNIGDD.FKDLHFPSPGFKAIAGVLYIPLSSTT...DDCVVFFYRKNQIREVHWAGR   |
|                  | <i>Nc Phy2</i>                                                | VVTSQDIKID.FPDLRYPPGFQVIAGLLYVPLSVGG...NDFIVLFRKGQVREVKWAGN     |
|                  | <i>Um Phy</i>                                                 | LVTSQDVHRD.FPDMVLSTGLHVIAAGLLVPLSGSG...VDFIAFLRKAQLRHVNWVAGK    |
|                  | <i>Gz Phy</i>                                                 | VVASQDVSED.FPDLRYPPGFQVAVAGLLYVPLSVGG...SDFIVFFFRKGQIKEVWVAGN   |
|                  | <i>Bf Phy1</i>                                                | VVTSQDIKID.FPDLRYPPGFNVIAAGLLVPLNSEG...DDFIVFFFRAGQITNVKWAGN    |
|                  | <i>An Phy</i>                                                 | VLTSNHIKID.FQDLNYPGPFKDISGLLYVPLSTDG...LDFIVFFFRGQLTEVWVWGCN    |
| <i>Gm Phy</i>    | VVASQDVKED.FPDLRYPPGFQVAVAGLLYVPLSVGG...NDFIVFFFRKGQIKEVWVAGN |                                                                 |
| <i>Ch Phy</i>    | VMTSTDIATD.FPDLRYPPGFHAIAGMLIVPLSVDG...EDFIVFFFRKGQLRQVWVWAGN |                                                                 |
| <i>Bf Phy2</i>   | IFSTHNIKID.LPKLKDSPAINSVAGILVIPLSTGG...NDFLIVFFFRGQLREVWVWAGN |                                                                 |
| <b>Cph</b>       | <i>Sy Cph1</i>                                                | VFFTSSLSQI.YPDA..VNFKSVASGLLAIPIA...R.HNELLWFRPEVLQTVNWAAGD     |
|                  | <i>Nc CphA</i>                                                | VFYTDSLQV.YPDA..ERYKNVASGLLAIPIS...Q.RNYVLWFRPEVIQTVNWAAGD      |
|                  | <i>Np Cph1</i>                                                | VFYTDSLQV.YPDA..ESFKNVASGLLAIPIA...K.RTYVLWFRPEVIQTVNWAAGD      |
|                  | <i>Np Cph2</i>                                                | LFSTDSLQV.YPDA..LIFKDTASGLLLLRISK...VR.RYVILWFRPEVIQTVNWAAGN    |
|                  | <i>Ci CphA</i>                                                | VFYTDSLQV.YPDA..EKFKNVASGLLAIPIS...K.RNYVLWFRPEVIQTVNWAAGN      |
| <i>Cw Cph</i>    | VFSTPSLPHL.YADA..RNFKNVASGLLAIKIS...H.RNYILWFRPEVIQTVNWAAGD   |                                                                 |
| <b>plant phy</b> | <i>Ath phyA</i>                                               | .LSTDSLHDAGFPRA..LSLGDVCGMAAVRISS...KDMIFWFRSHTAGEVVRWGGAA      |
|                  | <i>Ath phyB</i>                                               | .LSTDSLGDAGYPGA..AALGDAVCGMAVAYITK...RDFLWFRSHTAKEIKWGGAA       |
|                  | <i>Ath phyC</i>                                               | .FTTESLMESGYPPDA..SVLGESICGMAAVYISE...KDFLWFRSSTAKQIKWGGAA      |
|                  | <i>Ath phyD</i>                                               | .LSTDSLGDAGYPPRA..AALGDAVCGMAVACITK...RDFLWFRSHTAKEIKWGGAA      |
|                  | <i>Ath phyE</i>                                               | .LSTDSLVDAGYPGA..ISLGDVCGVAAAEEFSS...KDYLLWFRSNTASAIKWGGAA      |

|                  |                  |                    |                     |            |             |
|------------------|------------------|--------------------|---------------------|------------|-------------|
|                  |                  |                    | * * * * *           |            |             |
|                  | <i>Dr</i> BphP   | .....ATPDQAKDDL    | GPRHSFDTYLE         | EKRGYAE    | PWH 484     |
|                  | <i>No</i> AphB   | PHKPVE.VIA.NGEIRLS | SPRKSFDLWKE         | TVLLKSQ    | PW. 490     |
|                  | <i>Cl</i> CphB   | PHKPVE.LAD.DGSLRLS | SPRKSFDLWKE         | IVQRQSL    | PW. 507     |
|                  | <i>Pf</i> BphP   | PRKPLDLENSDAGLR.   | LRPRTSFEIWKVEMAGIST | KWS        | 488         |
|                  | <i>Ps</i> BphP1  | PNKPLNLDASDNTLR.   | LQPRTSFEIWKVEMTGIAT | KWS        | 488         |
|                  | <i>Ps</i> BphP2  | PAHHVSTRAAGSASHGLR | PROSFDVWQOEVTGIAR   | PWS        | 504         |
|                  | <i>Pa</i> BphP   | PEKLLTIGPS...GPR   | LTPRGSEAWEEVVRGH    | STPWS      | 475         |
|                  | <i>Pp</i> BphP1  | PTKQVG.PQG.....NLD | PRHSFERWQEEQ        | RGYSQAW.   | 493         |
|                  | <i>Pp</i> BphP2  | PNKTYDSGAL...GDR   | LTPRKSFAIWKET       | VHQQSLP    | PWT 478     |
|                  | <i>EnvSeq-1</i>  | PRAKLQ.SQS...GTL   | SPRKSFDAWTET        | TVRGRSL    | PWR 487     |
|                  | <i>EnvSeq-2</i>  | EAANKDVGKV.....L   | TNRNSFDMLQSV        | ADESVE     | WS 483      |
|                  | <i>EnvSeq-3</i>  | EQKPL.....         |                     |            | 300         |
|                  | <i>EnvSeq-7</i>  |                    |                     |            |             |
|                  | <i>EnvSeq-8</i>  |                    |                     |            |             |
|                  | <i>EnvSeq-12</i> | PHKPVETDAS...GT    | GISPROSFERWIE       | KRVGQSL    | PWN 479     |
| <b>BphP</b>      | <i>Xc</i> BphP   | POLAKLEDIP...NSR   | LSPRKSFDLWQOT       | TVRGRARR   | WS 490      |
|                  | <i>Xa</i> BphP   | POLAKLQDIP...NSR   | LSPRKSFDLWQOT       | TVRGRARR   | WS 490      |
|                  | <i>Rs</i> BphP   | PAEHGTWNP...TQR    | MRPRAFDWAKET        | VTGRSL     | PWT 565     |
|                  | <i>Kr</i> BphP   | PHHAEI.TRVEGLEVRIS | SPRKSFEKWEVVRGR     | STTW       | 497         |
|                  | <i>Mm</i> BphP   | PTKP...GSGGV...L   | TPROSFTTWSELAR      | GRARP      | W. 479      |
|                  | <i>Cyh</i> BphP  | PNKAI EKDKN...GL   | S PRKS FELWGEK      | VKNQSI     | PWS 482     |
|                  | <i>Rr</i> BphP   | PEKQPEITPE...GGL   | KIHPRTSFSLWRE       | EVGRSR     | VAFD 470    |
|                  | <i>Rc</i> Ppr    | PAKALG...AAGQR     | PMPRISEFDRWVE       | ERRGHA     | APWP 622    |
|                  | <i>Rl</i> BphP   | PHKPV EYGP...GPR   | LTPRKSFEAWSEL       | VVRGRSL    | PFT 480     |
|                  | <i>At</i> BphP1  | PHKTVQ.ESG...RI    | HPRKSFEIWKEL        | RNTSFP     | PWS 480     |
|                  | <i>At</i> BphP2  | PEKSYETGPM...GDR   | LTPRKSFAIWKET       | VRLQA      | APWS 478    |
|                  | <i>Br</i> BphP   | P...LKA.VIIGDD     | PSDLSRRSFAQW        | HQLVEG     | KSEPWS 488  |
|                  | <i>Rp</i> BphP1  | PDKSVT.AES...GR    | LRPRTSFAAWTE        | QTHGRA     | IAW. 483    |
|                  | <i>Rp</i> BphP2  | PHKPVQ.IGPR...GRR  | LQTRAFEAWR          | EEVDRDR    | SRPWR 499   |
|                  | <i>Rp</i> BphP3  | PRKPV E.ISDADGM    | QRLRPRNSFAL         | WKESVQ     | GRAVPWR 496 |
| <i>Rp</i> BphP4  | PNKPVG...VDAGAP  | RTPKGCASSWQ        | ESVRLH              | GEPPW. 487 |             |
| <i>Rp</i> BphP5  | PNKTYDTGPL...GDR | LTPRKSFSIWK        | EQVDGQ              | SVPWS 478  |             |
| <b>Fph</b>       | <i>Nc</i> Phy1   | PSLA.GKIGR.....L   | EPRNSFKKWTE         | VVDGTS     | KAWS 662    |
|                  | <i>Nc</i> Phy2   | PHEKTIQAGS...AAY   | LEPRKSFKVWYET       | TVIGKS     | REWS 830    |
|                  | <i>Um</i> Phy    | PFKE.GKEG...EA     | ILEPRKSFKVWSE       | TVEGTC     | RAWK 807    |
|                  | <i>Gz</i> Phy    | PYEK FVREGT...AG   | YLEPRKSFKTW         | HETVVG     | KCREWN 825  |
|                  | <i>Bf</i> Phy1   | PYEK FIKEGT...EG   | YLEPRKSFKTW         | NETVIG     | KCREWT 439  |
|                  | <i>An</i> Phy    | PNEAKFTEG.....H    | LEPRKSFQTW          | RETVLD     | RCDWT 727   |
|                  | <i>Gm</i> Phy    | PYEK FVREGT...AG   | YLEPRKSFKTW         | NETVVG     | KCREWN 775  |
| <i>Ch</i> Phy    | PYEK FIKEGT...EG | YLEPRKSFKTW        | SETVVG              | KCLEWT 760 |             |
| <i>Bf</i> Phy2   | PYEK.IKPAK...GQY | LEPRSF             | SRWQT               | TIKGT      | SKIWN 698   |
| <b>Cph</b>       | <i>Sy</i> Cph1   | PNHAYE.ATQEDGKIE   | LHPROSFDLWKE        | IVRLQSL    | PW. 489     |
|                  | <i>No</i> AphA   | PNQPFV.VNKLDGN     | VRLCPRKSFELW        | KETVRLT    | SLPW. 489   |
|                  | <i>Np</i> Cph1   | PNKAFE.VSQSEGN     | VRLCPRKSFELW        | KETVRLT    | SLPW. 489   |
|                  | <i>Np</i> Cph2   | PQESIK.AEG.DGSY    | TLSPRKSFEQW         | OETVRLT    | SLPW. 488   |
|                  | <i>Cl</i> CphA   | PNEAFE.VSQTEGN     | LRLVPRKSFELW        | KENVQLT    | SLRW. 489   |
|                  | <i>Cw</i> Cph    | PSKAYE.MQKIDGN     | LRLCPRKSFELW        | KETVRLT    | SLSW. 323   |
| <b>plant phy</b> | <i>Ath</i> phyA  | KHDPDDRDD...ARR    | MHPRSSEKAFLE        | VVKTRSL    | PWK 569     |
|                  | <i>Ath</i> phyB  | KHHPEDKDD...GQR    | MHPRSSEQAFLE        | VVKSR      | SQVPE 596   |
|                  | <i>Ath</i> phyC  | RHDPNDRD...GKR     | MHPRSSEKAFME        | IVRWK      | SVPWD 559   |
|                  | <i>Ath</i> phyD  | KHHPEDKDD...GQR    | MNPRSSEQTFLE        | VVKSR      | CQVPE 604   |
|                  | <i>Ath</i> phyE  | KHHPKDKDD...AGR    | MHPRSSEFAFLE        | VAKSR      | SLPWE 555   |

Supplemental Figure 3. Karniol et al.

|                  |                  |                                                                       |                                                                       |     |
|------------------|------------------|-----------------------------------------------------------------------|-----------------------------------------------------------------------|-----|
| <b>BphP</b>      | <i>Dr BphP</i>   | 21                                                                    | TENCEREPHIHPG..SIOPHGALLTADGHSG.....EVLQMSLNAAATFLGQEPTVLRG.QTLAALL   | 78  |
|                  | <i>No AphB</i>   | 14                                                                    | LSNCSKEPIHHPG..LIOPHGVLVLQEVLDL.....TILQVSNNTFNILGRHPEQLLN.QHLSCLL    | 71  |
|                  | <i>Ci CphB</i>   | 31                                                                    | LTNCDREPIHHPG..SIOPHGMLLALTEPEL.....TIVQVSRNTDEILGVAATEFIN.QPLSRL     | 88  |
|                  | <i>Pf BphP</i>   | 13                                                                    | LANCADEPIRFPG..AIOPHGVLTLSEPDLL.....SIIQISANVETLLARPAQELIG.QPLQSL     | 70  |
|                  | <i>Ps BphP1</i>  | 13                                                                    | LANCADEPIQFPG..AIOPHGVLFTLKEPEL.....TILQVSNVQSVLQKVPDQLAG.QTLDCVL     | 70  |
|                  | <i>Ps BphP2</i>  | 18                                                                    | LAECAREPIRIPG..AIOPHGVLVSVAGDPL.....CIEQVSANCAKSLGLESSELLG.QPLSILL    | 75  |
|                  | <i>Pa BphP</i>   | 9                                                                     | LANCADEPIHVPG..AIOPHGALVTLRAD.G.....MVLAASENIQALLGFVVASPGSY.LTQEQV    | 64  |
|                  | <i>Pp BphP1</i>  | 18                                                                    | MERCAQEPHQVPG..SIOPHGVLVLDATDL.....RVLQASENVEHWLGLPARELIG.CHFADLV     | 75  |
|                  | <i>Pp BphP2</i>  | 9                                                                     | LTNCDREPIQIPG..SIOPHGCLLACDASAT.....VLRHSVNAQMLGVAN.DING.QKLHAVL      | 65  |
|                  | <i>EnvSeq-1</i>  | 12                                                                    | VENCANEPHIHPG..GIOPHGFLFSA.ADG.....TVLQASSNATQLNGEPAQNALG.QPLAQFL     | 68  |
|                  | <i>EnvSeq-2</i>  | 1                                                                     | LQNCDEFAHLLIE..SVQSFYVIAVDPETK.....KIQVSEINELFKVS..ITAGETLITEL        | 56  |
|                  | <i>EnvSeq-6</i>  | 12                                                                    | VNQCDREPIHLLG..KIQNQGFMIIVD.KAG.....VVTHLSENLEHFANVTRDNLIG.QSLWELL    | 68  |
|                  | <i>EnvSeq-7</i>  | 27                                                                    | FERCDEPIHHPG..SIQSYGFLIAFNKDL.....KISIVSDNCESVFTEP..LIG.KHFLEIL       | 81  |
|                  | <i>EnvSeq-12</i> | 21                                                                    | SNICESEPFSFSG..MIOPHGALVQVD.LTG.....RITHASANIGNLIPELPEHFGK.KLPADLL    | 77  |
|                  | <i>EnvSeq-9</i>  | 10                                                                    | LANCADEPIRFPG..AIOPHGVLTLSEPL.....NIIQVSNVGTFLGHAPALLD.QPLHRLI        | 67  |
|                  | <i>Xc BphP</i>   | 10                                                                    | LDVCAREPIHHPG..LIQPYGVLLVDPADG.....RIVQASTTAADLLGVPMAALLG.MPYTQVL     | 67  |
|                  | <i>Xa BphP</i>   | 10                                                                    | MDVCAQEPHIHPG..LIQPYGVLLVIEPADG.....RIVQASSTAADLLGVPMDALLG.TPYTQVL    | 67  |
|                  | <i>Rs BphP</i>   | 95                                                                    | PSICEMEPHATPG..AIOPHGALMTARADSG.....RVAHASVNLGEILGLPAASVLG.APIGEVI    | 152 |
|                  | <i>Kr BphP</i>   | 21                                                                    | LTTCEREPHIHPG..AIOPHGVLAVERGDH.....RVVVASANAAGFFGRPLPEVLS.SSLADLL     | 78  |
|                  | <i>Mm BphP</i>   | 12                                                                    | LQGCESERHLHSG..EIQPFGALLRLD.PDG.....QVSHASANCGAVLGPPEALLG.QIPGPLL     | 71  |
|                  | <i>Cyh BphP</i>  | 14                                                                    | LQNCDOEPHIHPG..SIOPHGFLIAITKETW.....EIRFCSENVIDFIGLSHKQLLQ.KKITEIF    | 68  |
|                  | <i>Rr BphP</i>   | 5                                                                     | HSTCDQEPHVPG..LVQPHGFLVVLDSKSG.....RIAQVTPGIEAVAGVVAQRLIG.EPLERV      | 62  |
|                  | <i>Rc Ppr</i>    | 157                                                                   | FSVCEQEDIRRVG..AIQPWGAVLAVDPRDW.....TVCAASDNAQALLDCARPP.LG.RPLGEVL    | 213 |
|                  | <i>Ri BphP</i>   | 10                                                                    | LTNCDREPIHQLG..SVQPFGLVLAWS.DW.....IVIRASANLAEFLGVTEANALG.RPVISLI     | 66  |
|                  | <i>At BphP1</i>  | 17                                                                    | LDSGAEPIHHPG..AIQEHGALLVLSAREF.....SVVQASDNLANYIG.VDLPIG.AVATEAN      | 72  |
|                  | <i>At BphP2</i>  | 10                                                                    | LTNCDREPIHHPG..YIQPHGCLLACDNAMR.....MVLRHSNCGELLLGLEG.DLNG.RTAEDVL    | 66  |
|                  | <i>Br BphP</i>   | 15                                                                    | LANCEREPHLAG..SIOPHGILAVKEPDN.....VVIQASINAAEFLNTN.SVVG.RPLRDLG       | 70  |
| <i>Rp BphP1</i>  | 12               | LSTCDDEPIHHPG..AIOPHGVLALALA.ADM.....TIVAGSDNLPCLTGLAIGALIG.RSAADV    | 68                                                                    |     |
| <i>Rp BphP2</i>  | 25               | LTECDREPIHHPG..AIOPHGVLVFWSETDL.....RIASVANVEDLLRQPASL.N.VPIAHYL      | 82                                                                    |     |
| <i>Rp BphP3</i>  | 17               | LSSCDRELVQYPE..AIOPHGAMLVDEQSD.....RVLHASANCAAFIGKPEAVIG.APIAAVL      | 74                                                                    |     |
| <i>Rp BphP4</i>  | 20               | TLAGGTRTEVLPG..AIOPHAALLALAPADL.....TIVHAAGATASLLGAAAELLPG.TAATAF     | 77                                                                    |     |
| <i>Rp BphP5</i>  | 7                | LTSNCDREPIHHPG..SIQPCGCLLACDAQAV.....RITRISSENAGAFFGRET.PRVG.ELLADYF  | 63                                                                    |     |
| <b>Fph</b>       | <i>Nc Phy1</i>   | 120                                                                   | FTTCDEPIHHPG..AIQSYGMVLVAKLVDERVAGPSRYLPRICSENSAFVCHYQPSSELLSLDSFYQVM | 186 |
|                  | <i>Nc Phy2</i>   | 291                                                                   | LQRCDEPIHHPG..AVQGFGLMVVQVEERD....GRFIVRFVSEMSKRIIGYTPQELFRMNNFLDIF   | 352 |
|                  | <i>Um Phy</i>    | 181                                                                   | LARCEDEPIHHPG..AVQSFQCMIVVRISPD....GEMLRQASENSAAILGMSPSYLFSLPTFLDLF   | 242 |
|                  | <i>Gz Phy</i>    | 300                                                                   | LQRCDEPIHHPG..AVQTFGVVVALREEND....GCFVARYVSENSVRMLGYTPKQLFQLKNFLDIL   | 361 |
|                  | <i>An Phy</i>    | 192                                                                   | FKACDEPIHHPG..AIQSFQALVAVREEPG....EQMVVRIVSEMSQDILGYSPPNDLFSLPTLCDIF  | 253 |
|                  | <i>Gm Phy</i>    | 237                                                                   | LQRCDEPIHHPG..AIQTFGALVALREEND....GCFVARYISENSERMLGYTPKQLFQLKNFLDIL   | 298 |
|                  | <i>Ch Phy</i>    | 221                                                                   | LQRCDEPIHHPG..AVQGFGLVVALRDDPD....GNLQVRIVSENSKRILGRTPKELFALESFTDIL   | 282 |
| <i>Bf Phy2</i>   | 157              | FFKCEDEPIHHPG..AIQOYGALLALRYNDQ....GDLMVRIASENAFKILKYTPEQLFSLNSFLDLL  | 218                                                                   |     |
| <b>Cph</b>       | <i>Sy Cph1</i>   | 12                                                                    | LRQLETLAHTAH..LIOPHGVLVVLQEPDL.....TISQISANCTGILGRSPEDLLG.RTLGEVF     | 69  |
|                  | <i>No AphA</i>   | 12                                                                    | VTSLKEAPIHLSG..QIQPHGVLVLEEPGL.....KILQVSNNTWVILGINAENILQ.KKLEDLL     | 69  |
|                  | <i>Np Cph1</i>   | 12                                                                    | LISLKEAPIHISS..QIQPHGVLVLEEPGL.....KILQVSNNTWVILGINAENILQ.KKLEDLL     | 69  |
|                  | <i>Np Cph2</i>   | 14                                                                    | LTNHRKPIHHPG..SIOPHGILALSTL.QL.....EIVQVSNNTQVYLCKAPEDLLG.RPLSYLL     | 70  |
|                  | <i>Ci CphA</i>   | 12                                                                    | VNSLKEAALHVCS..QIQPHGVLVLEEPGL.....NILQISSNNTWVILGINAENILQ.KKLEDLL    | 69  |
| <i>Cw Cph</i>    | ?                | LKRLEELQHLHWG..KIQPHGVLVFLDESNL.....KIVQTSNNTKQFFGIIPQEI.VN.LTLDLDF   | ??                                                                    |     |
| <b>plant phy</b> | <i>Ath phyA</i>  | 66                                                                    | VTTTYLHHTQKKG..LIQPFQCLLALDEKTF.....KVIAYSENASELLTMASHAVPSVGEHPVLG    | 124 |
|                  | <i>Ath phyB</i>  | 96                                                                    | QITAYLSRIQRGG..YIQPFQCLLAVDESSF.....RIIGYSENAREMLGIMPQSVPTLE.KPEIL    | 153 |
|                  | <i>Ath phyC</i>  | 61                                                                    | AVSTYLQKIQRGM..LIQPFQCLLAVDEKTL.....KVIAFSENTQEMGLIPHTVPSMEQREALT     | 119 |
|                  | <i>Ath phyD</i>  | 102                                                                   | QITAYLSRIQRGG..YIQPFQCLLAVEESTF.....TIIGYSENAREMLGLMSQSVPSIEDKSEVL    | 160 |
|                  | <i>Ath phyE</i>  | 62                                                                    | HITAYLSNIQRGG..LVQPFQCLLAVEEPSF.....RILGLSDNNSDFLGLL.SLPSTSHSGEFD     | 118 |
| <i>Ma BphP1</i>  | 409              | LKACWAEPIHHPG..GGEVGLGVFTIYLRETRKPR.....EEEFIRTNAYLAGIAIEHVQAADALKE.. | 468                                                                   |     |



Supplemental Figure 4. Karniol et al.

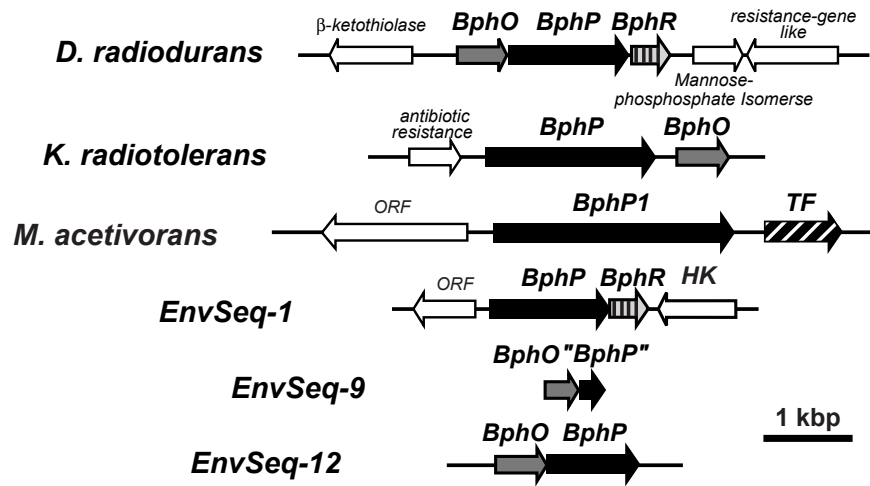

Supplement: bj3920103add.pdf [file bj3920103add.pdf]
